# Supplementary material for: AUF1 p42 isoform selectively controls both steady-state and PGE2-induced FGF9 mRNA decay
Source: PubMed Central journal article supplement — Nucleic Acids Res. 2010 Aug 16;38(22):8061–71. doi: 10.1093/nar/gkq717 (PMC3001084; doi:10.1093/nar/gkq717), 2010-08-16
Supplement: supp_gkq717_Supplementary_data_20100701.pdf [file supp_gkq717_Supplementary_data_20100701.pdf]

## **Supplementary methods**

### **AUF1 phosphorylation assay**

To detect whether AUF1 protein phosphorylated after PGE2 treatment, whole cell lysates were isolated from PGE2- and ethanol-treated cells and subjected for Western blot analysis using the following antibodies: mouse anti-phospho-threonine and anti-phospho-tyrosine (Cell Signaling Technology, MA, USA), and rabbit anti-phospho-serine (Abcam, Cambridge, UK).

**Supplementary Table 1. ARE-containing FGFs family genes**

| <b>Accession number</b> | <b>Gene name</b>                   | <b>Gene Symbol</b> | <b>Class <sup>a</sup></b> | <b>Cluster <sup>b</sup></b> | <b>Chromosome</b> |
|-------------------------|------------------------------------|--------------------|---------------------------|-----------------------------|-------------------|
| NM_033649               | Fibroblast growth factor 18        | FGF18              | 1                         | Cluster 5                   | 5                 |
| AF110400                | Fibroblast growth factor 19        | FGF19              | 1                         | Cluster 5                   | 11                |
| NM_002006               | Fibroblast growth factor 2 (basic) | FGF2               | 1                         | Cluster 5                   | 4                 |
| BC018404                | Fibroblast growth factor 21        | FGF21              | 2                         | Cluster 3                   | 19                |
| AB047858                | Fibroblast growth factor 23        | FGF23              | 2                         | Cluster 2                   | 12                |
| NM_002007               | Fibroblast growth factor 4         | FGF4               | 2                         | Cluster 4                   | 11                |
| AF171928                | Fibroblast growth factor 5         | FGF5               | 1                         | Cluster 5                   | 4                 |
| M60828                  | Fibroblast growth factor 7         | FGF7               | 2                         | Cluster 4                   | 15                |
| NM_002010               | Fibroblast growth factor 9         | FGF9               | 2                         | Cluster 4                   | 13                |

<sup>a</sup> ARE classification according to Chen et al. (1)

<sup>b</sup> The ARED cluster assigned to the gene (2).

### Reference

1. Chen, C.Y. and Shyu, A.B. (1995) AU-rich elements: characterization and importance in mRNA degradation. *Trends Biochem Sci*, **20**, 465-470.
2. Bakheet, T., Williams, B.R. and Khabar, K.S. (2006) ARED 3.0: the large and diverse AU-rich transcriptome. *Nucleic Acids Res*, **34**, D111-114.

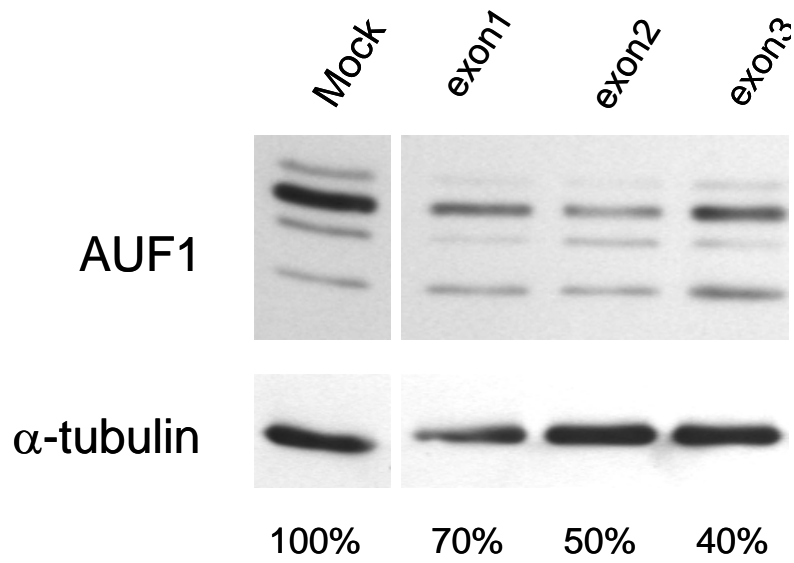

**Supplementary Figure 1. AUF1-specific siRNA knocks down AUF1 expression in HEK293 cells.** The commercial RNAi reagents included 3 different siRNAs that target exons 1 to 3. Compare to the Mock control, the overall knockdown effects of 3 siRNAs are 70%, 50%, and 40% in exon1-, exon2-, and exon3-specific siRNA. The exon1-specific siRNA gave the best knockdown effect and was used in the experiments thereafter.

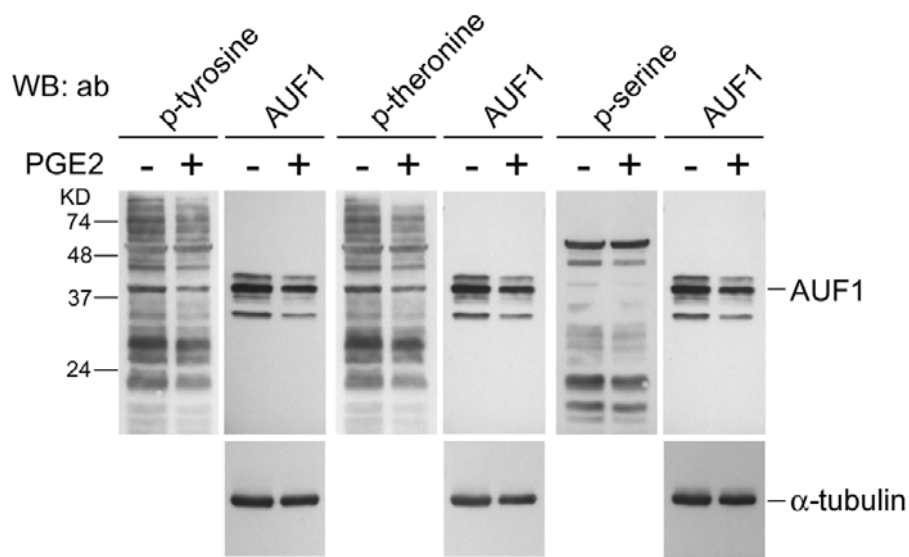

**Supplementary Figure 2.** PGE<sub>2</sub> treatment has no effect on AUF1 protein phosphorylation. Human primary endometrial stromal cells were treated with PGE<sub>2</sub> or EtOH control. Total cell lysates were isolated and subjected to the detection of phosphorylation level using various phosphorylation-specific antibodies. While AUF1 protein showed no phosphorylated serine residues, levels of phosphorylated tyrosine or theronine were no different between PGE<sub>2</sub>- or EtOH-treated cells.
